# Supplementary material for: A ratiometric electrochemical sensor based on Cu@Ni/MWCNTs for detection of chloramphenicol
Source: Research Square preprint supplement (doi:10.21203/rs.3.rs-5762552/v1), 2025-01-09
Supplement: Supplementary file 1 [file ffeb1d2c0f836da7dd57ff8c.docx]

**Supporting Information**

**A ratiometric electrochemical sensor based on Cu@Ni/MWCNTs for detection of chlo-ramphenicol**

Xiaoxue Liu,1,2 Dongyang Wang,1,3* Rongxuan Xu1,3, Xing Gao1, Mingyang Han1,3, Yurong Guo1, Lei Yu1,3*

1College of Biological and Chemical Engineering, Qilu Institute of Technology, Jinan 250200, P. R. China

2School of Pharmacy, Chengdu Medical College, Cheng Du, 510500, Sichuan Province PR China

3School of Environmental and Chemical Engineering, Jiangsu University of Science and Technology, Zhenjiang 212003, Jiangsu Province, PR China

*Corresponding authors’ *e-mail addresses*: wangdongyang@just.edu.cn (D. Wang); [yulei@qlit.edu.cn](mailto:yulei@qlit.edu.cn) (L. Yu).

**Reagents and Materials**

Nickel chloride (NiCl2), copper sulfate (CuSO4) and hydrazine hydrate (N2H4·H2O) were purchased from Sigma-Aldrich (Shanghai, China). Trisodium citrate dihydrate (Na3C6H5O7·2H2O), sodium borohydride (NaBH4), N,N-dimethylformamide (C3H7NO) were obtained from Shanghai Aladdin Co. (Shanghai, China). Multi-walled carbon nanotubes (MWCNTs) were supplied by Nanjing Xianfeng nanotechnology Co (Nanjing, China). Ferrocene (Fc), Potassium ferricyanide (Fe(CN)63−/4−) were bought from Adamas Reagent Co. Ltd. (Shanghai, China[).](http://www.adamas-beta.com).) Other reagents and chemicals, such as chloramphenicol (CAP), terramycin (TR), tetracycline (TC), thiamphenicol (TAP), kanamycin (Kana), Mountain green (MG) and Florfenicol (FF) were purchased from Shanghai Yuanye Biotechnology Co. Ltd. (Shanghai, China[)](http://www.tansoole.com)). Phosphate buffer solution (PBS) was prepared from KH2PO4 and K2HPO4. All chemicals were analytical grade and directly used without further purification.

**Instruments**

The electrochemical test was conducted with a CHI660E Electrochemical Workstation (ChenHua Instruments Co. Ltd., Shanghai, China). Morphological information and elemental characteristic were obtained via scanning electron microscopy (SEM, Jena, Germany), high-resolution transmission electron microscopy (HRTEM, JEM-1200EX), and energy-dispersive spectroscopy (EDS, scanning electron microscope, Zeiss Supra 55VP). X-ray diffraction (XRD) patterns of materials were recorded by Rigaku Giegerflex D/Max B diffractometer (Rigaku Corp., Tokyo, Japan) with Cu Kα radiation.

Figure S1. EDS spectra of (a) Ni/MWCNTs and (b) Cu@Ni/MWCNTs

**The effective surface area of different electrodes**

*I*P = 268600n3/2*AD*1/2*Cv*1/2

Where *I*P represents the oxidation peak current, n is the number of electrons transferred in the redox reaction, A stands for the effective surface area of the electrode, D is the diffusion coefficient of 5 mM [Fe(CN)6]3−/4− in 0.1 M KCl (6.70±0.02×10−6 cm² s−1), C is the concentration of the probe (mol cm−3), and *v* is the scan rate (mV/s).

Initially, the CV curve of the bare GCE (with a surface area of 0.5 cm²) was recorded in 5 mM ([Fe(CN)6]3−/4−) at a scan rate of 100 mV/s, yielding an *I*P value of 4.6×10−4 A. The specific surface areas of MWCNTs/GCE, Ni/MWCNTs/GCE, and Cu@Ni/MWCNTs/GCE were determined to be 0.63 cm², 0.72 cm², and 0.86 cm², respectively.

Figure S2. DPV plots of (a) bare GCE and (b) Cu@Ni/MWCNTs/GCE in 0.1 M PBS (pH 7.4), PBS containing either 10 μM CAP, or 5 μM Fc or both.

Figure S3. (a) DPV curves of Cu@Ni/MWCNTs/GCE in 0.1 M PBS containing 10 μM CAP at different pH values (5.0~10.0). (b) The linear relationship between peak currents and pH values.

Figure S4. (a) Cyclic voltammograms of Cu@Ni/MWCNTs/GCE in 0.1 M pH7.4 PBS containing 10 μM CAP at the scan rates from 10 to 60 mV s−1. (b) Calibration curves of anodic and cathodic peak current values versus square root of scan rate.

Figure S5. DPV curves of Cu@Ni/MWCNTs/GCE in 0.1 M pH7.4 PBS containing 5 μM Fc and 10 μM CAP (a) with continuous scan of 20 times, (b) six different electrodes and (c) after 20 days of storage.

Table S1Comparison of the characteristics of some reported methods for CAP determination.

| **Sensors** | **Methods** | **Linear range (μM)** | **LOD (μM)** | **Referneces** |
| --- | --- | --- | --- | --- |
| MWCNTaCTAB-PDPA | DPV | 500 - 1 × 105 | 10 | [1] |
| Short-MWNTs-COOH/Ag NPs | DPV | 0.3 - 229 | 0.049 | [2] |
| Au/N-G | LSV | 2 – 80 | 0.6 | [3] |
| LaV/F-BN | CV | 0.015 – 300 | 0.003 | [4] |
| ZnW NPs | DPV | 0.1 – 849 | 13 | [4] |
| Cu@Ni/MWCNTs/GCE | DPV | 0.5 - 500 | 0.18 | This work |

Table S2 Determination of piroxicam in real samples using Cu@Ni/MWCNTs/GCE (n=3) a, b

| **Sample** | **Methods** | **Spiked** | **Total found** | **Recovery (%)** | **RSD (%)** |
| --- | --- | --- | --- | --- | --- |
| milk | Cu@Ni/MWCNTs/GCE | 2.00 | 2.05 ± 0.1252 | 102.57 | 4.1 |
| 5.00 | 5.12 ± 0.1335 | 102.41 | 2.6 |
| 10.00 | 9.91 ± 0.0864 | 99.27 | 1.2 |
| HPLC | 2.00 | 2.08 ± 0.21 | 104.43 | 2.9 |
| 5.00 | 4.87 ± 0.07 | 97.47 | 3.7 |
| 10.00 | 9.91 ± 0.08 | 99.26 | 1.1 |
| honey | Cu@Ni/MWCNTs/GCE | 2.00 | 2.13 ± 0.1081 | 106.51 | 5.1 |
| 5.00 | 4.88 ± 0.1232 | 97.68 | 3.2 |
| 10.00 | 10.14 ± 0.1413 | 101.8 | 2.7 |
| HPLC | 2.00 | 2.07 ± 0.13 | 103.51 | 1.7 |
| 5.00 | 4.86 ± 0.09 | 97.52 | 1.2 |
| 10.00 | 9.64 ± 0.12 | 96.68 | 4.4 |

aMean value±SD; b The unites of the value is μM

**References**

[1] Li W, Guo X, Shen B, et al. Facile synthesis of sub-10 nm Cu-MOF nanofibers as electrochemical sensor element for picomolar chloramphenicol detection[J]. Journal of Electroanalytical Chemistry, 2024: 118160.

[2] Abhishek K J, Reddy S, Acharya S, et al. A review on nanomaterial-based electrodes for the electrochemical detection of chloramphenicol and furazolidone antibiotics[J]. Analytical Methods, 2022, 14(34): 3228-3249.

[3] Saleem M, Latif H, Anjum D H, et al. Au/NG/SWCNTs/FTO-glass modified electrode based electrochemical biosensor for DNA detection[J]. Microchemical Journal, 2023, 193: 109206.

[4] Abhishek K J, Reddy S, Acharya S, et al. A review on nanomaterial-based electrodes for the electrochemical detection of chloramphenicol and furazolidone antibiotics[J]. Analytical Methods, 2022, 14(34): 3228-3249.
